# Supplementary material
Source: PubMed Central journal article supplement (PMC3032611)
Supplement: NIHMS150929-supplement-01.pdf [file NIHMS150929-supplement-01.pdf]

**Figure S1**

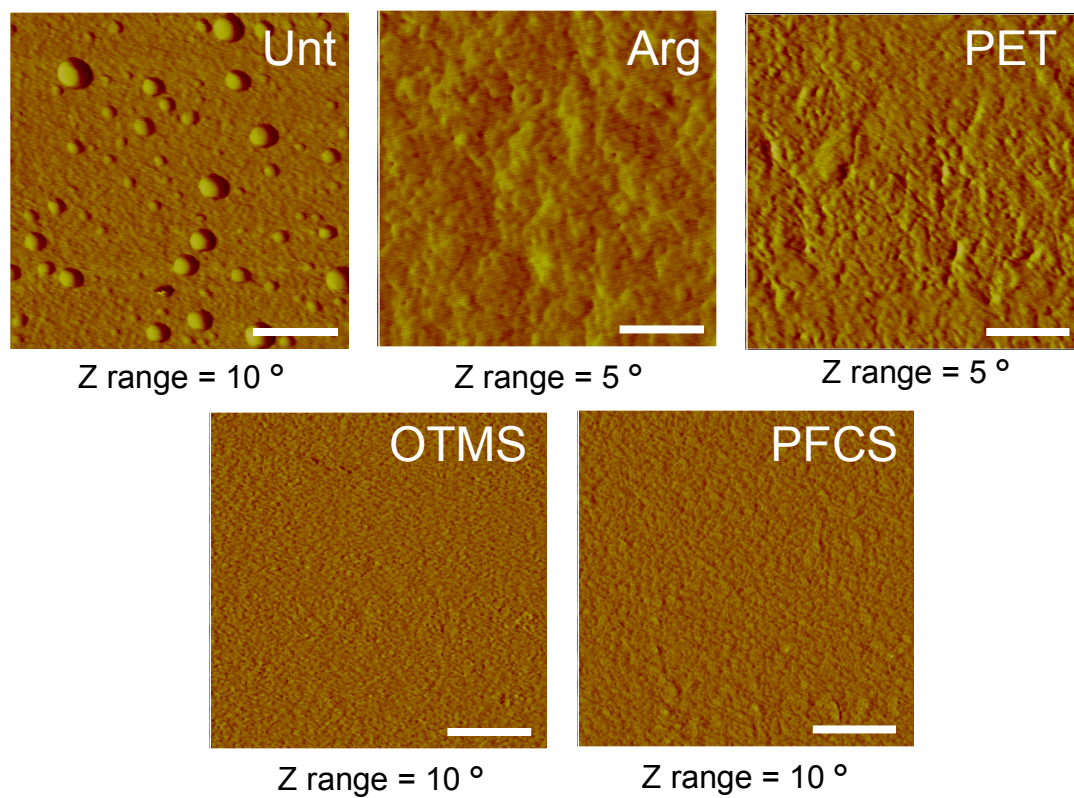

**Figure S1.** AFM phase images of dimethacrylate disks collected concurrently with height images do not indicate substantial changes in phase on the disk surfaces. Scale bars = 500 nm.

**Figure S2**

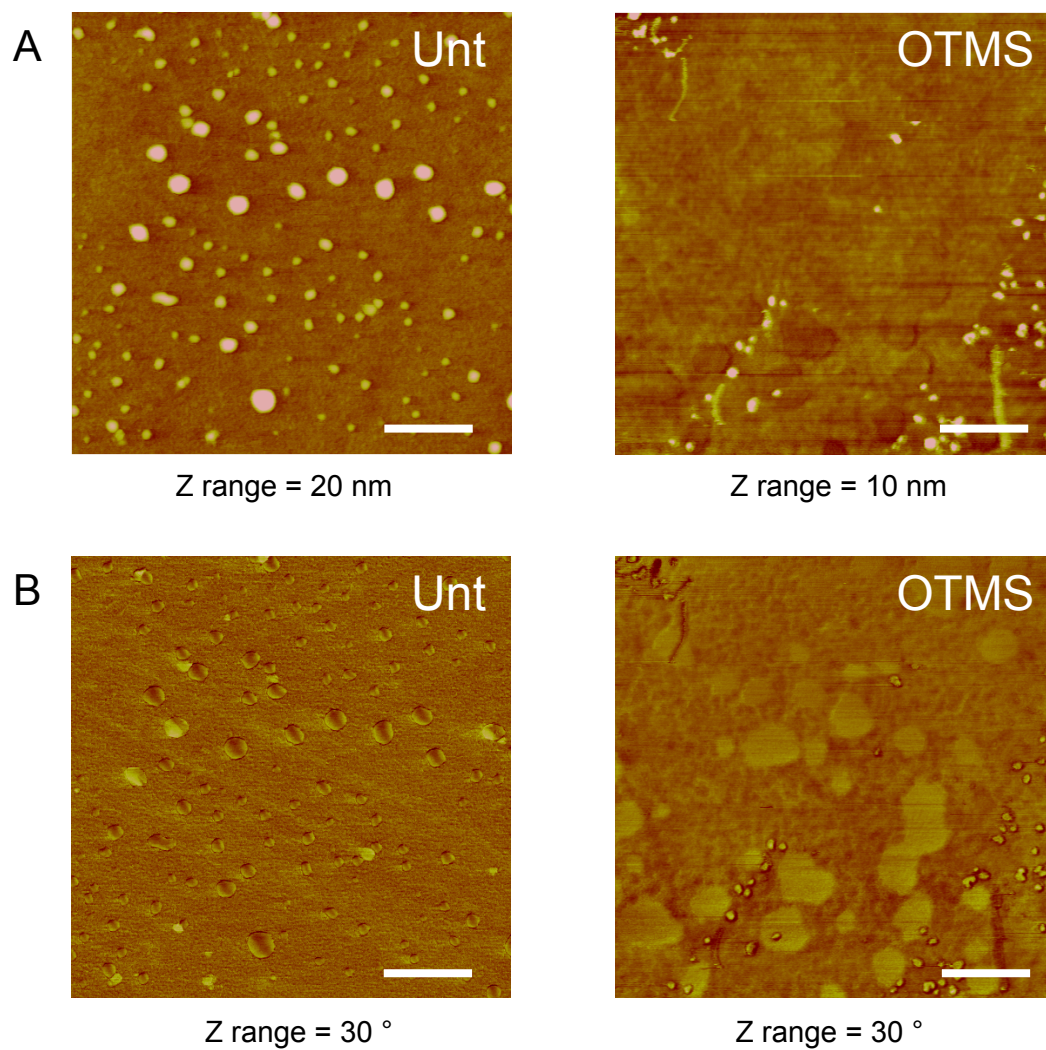

**Figure S2.** Height (A) and phase (B) images of untreated and OTMS-treated glass collected using AFM. Nodules resembling those seen on Unt dimethacrylate disks are present on the untreated glass and in some locations on OTMS-treated glass.
